# Supplementary material for: Pancreatic Cancer 3D Cell Line Organoids (CLOs) Maintain the Phenotypic Characteristics of Organoids and Accurately Reflect the Cellular Architecture and Heterogeneity In Vivo
Source: MDPI journal article supplement (doi:10.3390/organoids1020013), 2022-12-12
Supplement: s1 [file s1]

Archive with 1 entries (1 files):
- organoids-1971955-supplementary.pdf
