# Supplementary material for: Pancreatic Cancer 3D Cell Line Organoids (CLOs) Maintain the Phenotypic Characteristics of Organoids and Accurately Reflect the Cellular Architecture and Heterogeneity In Vivo
Source: MDPI journal article supplement (doi:10.3390/organoids1020013), 2022-12-12
Supplement: s1 [file s1 › organoids-1971955-supplementary.pdf]

## Supplementary Figures:

**A**

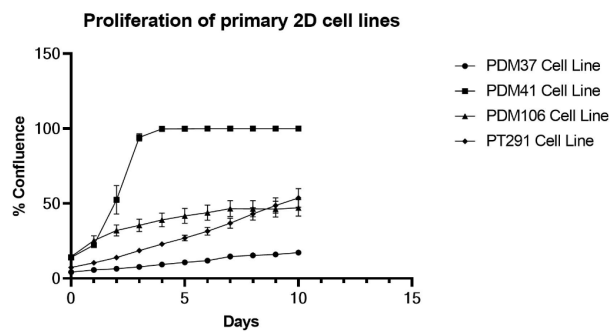

**B**

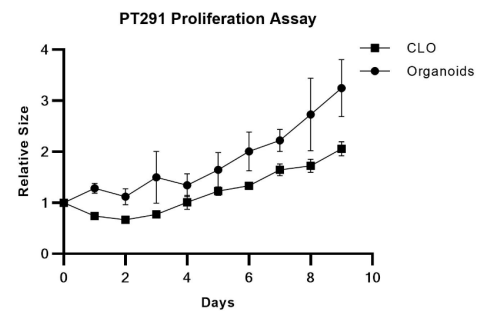

**Supplementary Figure S 1: (A) Percentage of confluence of the cell lines PDM37-CL, PDM41-CL, PDM106-CL and PT291-CL cultured over 10 days. Total brightfield area of CLOs and organoids cultured over 9 days plotted as relative size (B) PDM291-CLO vs organoids**

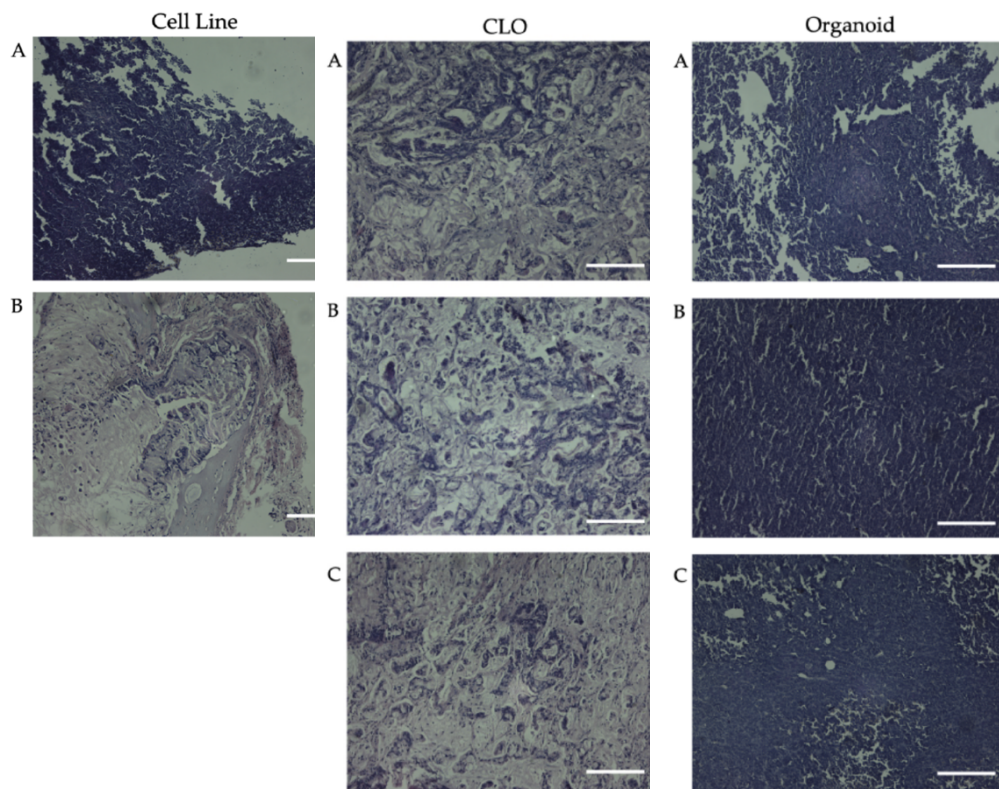

**Supplementary Figure S2: H&E staining of PT291 Cell line (n=2), CLO (n=3) and organoid (n=3) in SCID mice. Images taken at 100X magnification. Scale bars 20 um.**

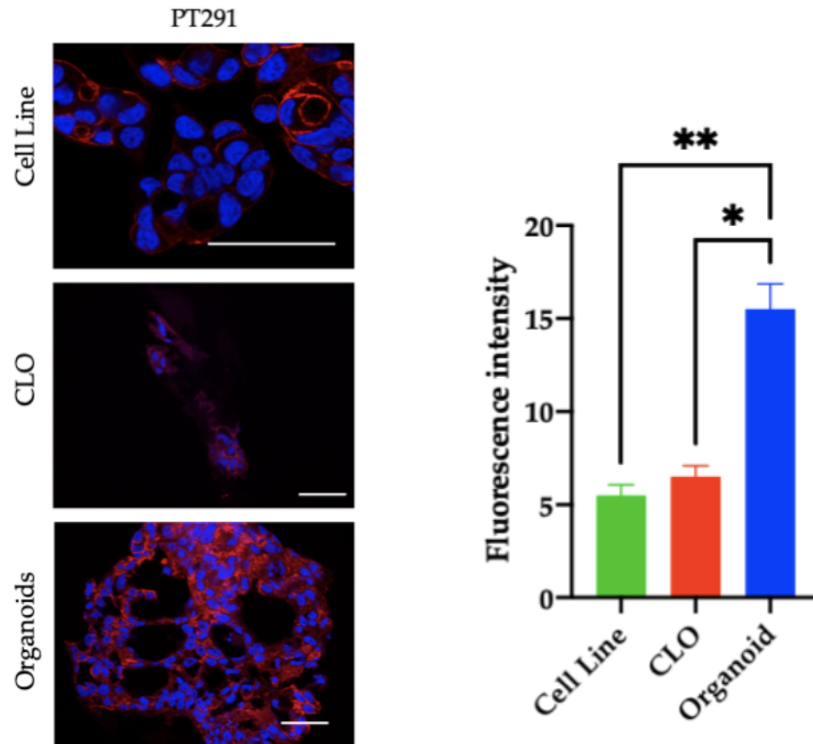

**Supplementary Figure S3: Images of immunofluorescence staining of HCAM (green/red) and counterstained with DAPI (blue) in matched cell lines, CLOs and organoids from patients PT291. Scale bars 100 μm. A repeated measure ANOVA was used to determine statistical significance. \* denotes  $p < 0.005$ , \*\* denotes  $p < 0.01$ , \*\*\* denotes  $p < 0.001$ .**
